# Supplementary material
Source: Springer Nature journal article supplement (https://www.springermedizin.de/resource/supplementary/12963_2011_172_MOESM14_ESM.pdf/9572812)
Supplement: MOESM14 [file 9572812]

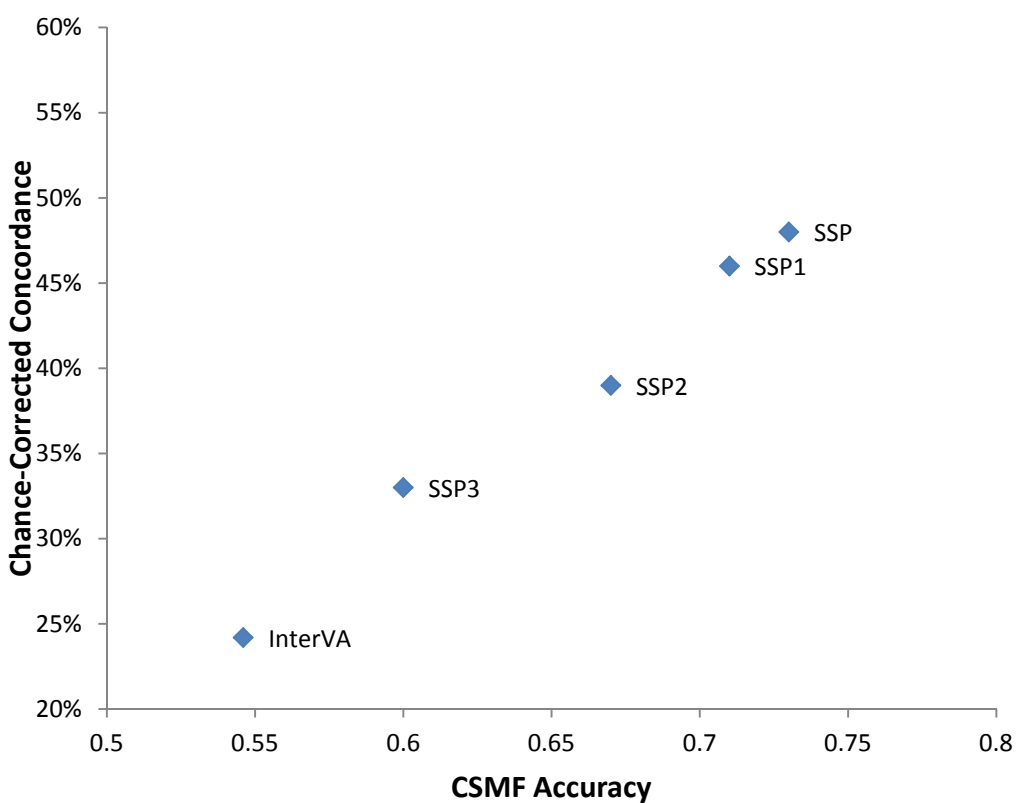

SSP: Simplified Symptom Pattern Method

SSP 1: SSP, but evaluates probabilities of all causes independently

SSP 2: SSP 1, but uses only the symptoms that match to InterVA items

SSP 3: SSP 2, but evaluates each symptom independently as opposed to in clusters

InterVA: InterVA Method
